# Supplementary material for: Monthly element/Ca trends and inter chamber variability in two planktic Foraminifera species: Globigerinoides ruber albus and Turborotalita clarkei from a hypersaline oligotrophic sea
Source: Copernicus journal article supplement (doi:10.5194/egusphere-2025-1929), 2025-06-12
Supplement: Supplementary file [file egusphere-2025-1929-AC2-supplement.pdf]

Response to the referee: Lennart de Nooijer

Dear Lennart,

Thank you very much for your very much appreciated comments and suggestions in your review of our paper. We have addressed all of them. Please see the itemized list below (the reviewer comments in bold):

**Item 1: In summary: not just the means, but the full single-chamber El/Ca should be shown and (statistically) analyzed. Now, only the standard error is shown (figure 3, although very difficult to distinguish). There are multiple questions that the authors could answer:**

- a- **what exactly is the between-chamber variability in El/Ca and**
- b- **how does this relate to the chamber number?**
- c- **Does that change with time?**
- d- **Is it similar between depths and is it similar for the different elements? If there are differences, are they significant?**

*Reply 1: To address the lack of statistical analysis and information in the paper, we implemented a number of changes: 1) We've now reported standard deviations (SDs) in each specimen (individual foram) as a measure of inter-chamber variability for each discussed El/Ca (results section 3.1 in the revised manuscript). The measured El/Ca and associated specimen means and SDs are also being reported in a supplementary table (supplementary table S4). Furthermore, we included statistical analyses of both El/Ca means and the SDs for each species and included environmental parameters (MLD, temperature, salinity and pH) as shown by new 'Spearman correlation matrix' (revised manuscript figure 9 and supplementary figure S12; see 'Figure 1' below). The new spearman correlation matrix of SD shows that environmental parameters, such as MLD, correlate to ICV in some species (i.e. *T. clarkei* 'big'). 2) in the revised manuscript timeseries plots (figures 3-7) we show the pooled means and SD for each chamber at each given time interval (e.g., see Mg/Ca in Figure 2 below; in the revised manuscript it is titled Figure 3). As reported in our original version in supplementary figure S11, F0 El/Ca was found to be generally lower for *G. ruber* (figure 3 in the revised manuscript) but generally equal to or higher than the other chambers for *T. clarkei*, but within 2SD. We also find that during water column mixing (March-May) and deepening of the MLD the SD is higher compared to the other months of the year which is supported by the spearman correlation matrix of SD. Section 4.1, lines 576-589, were included in the revised manuscript: "In most element/Ca ICV is higher during water column mixing months (March-May; e.g., Al/Ca, B/Ca, Ba/Ca, Co/Ca, Fe/Ca, Mg/Ca) in all water depth horizons for *T. clarkei* 'big' and *T. clarkei* 'encrusted' and mainly in the two upper water depth horizons (i.e., 120 m and 220 m) for *G. ruber albus*. These elevated values and high ICV likely reflect the changes in the water properties like the temperature, salinity, pH and nutrient availability derived from the mixing of the water column (Fig. 9, Figs 3-7 panels h, p and x). For some element/Ca ratios (e.g., Na/Ca, Fig. 6/panels g, o and w; Ba/Ca, Fig. 7/panels g, o and w), ICV varies with depth and shows seasonal differences i.e., less variation with depth during water column stratification and more variation with depth during water column mixing; whereas for others (e.g., B/Ca, Fig. 5/panels g, o and w; Sr/Ca, Fig. 4/panels g, o and w) it remains relatively constant with depth."). As for the original figure 3 in the previous version of the manuscript, this is a summary for comparing all the El/Ca data and*

has been left in the paper but moved to be figure 8 (in the revised manuscript) following restructuring of the results and discussion.

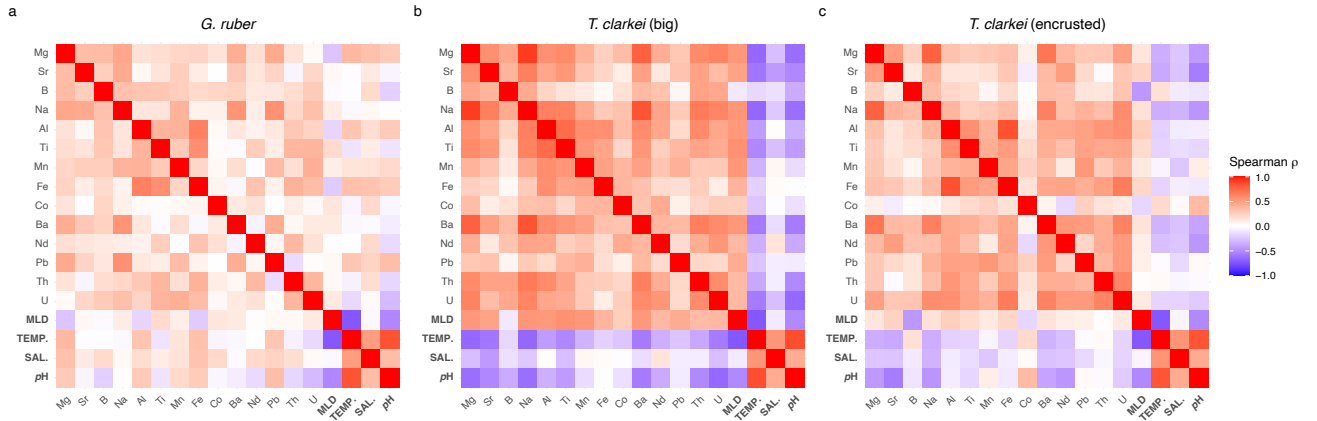

Figure 1: Spearman Correlation Matrix for SD of El/Ca (Supplementary figure S12 in revised manuscript).

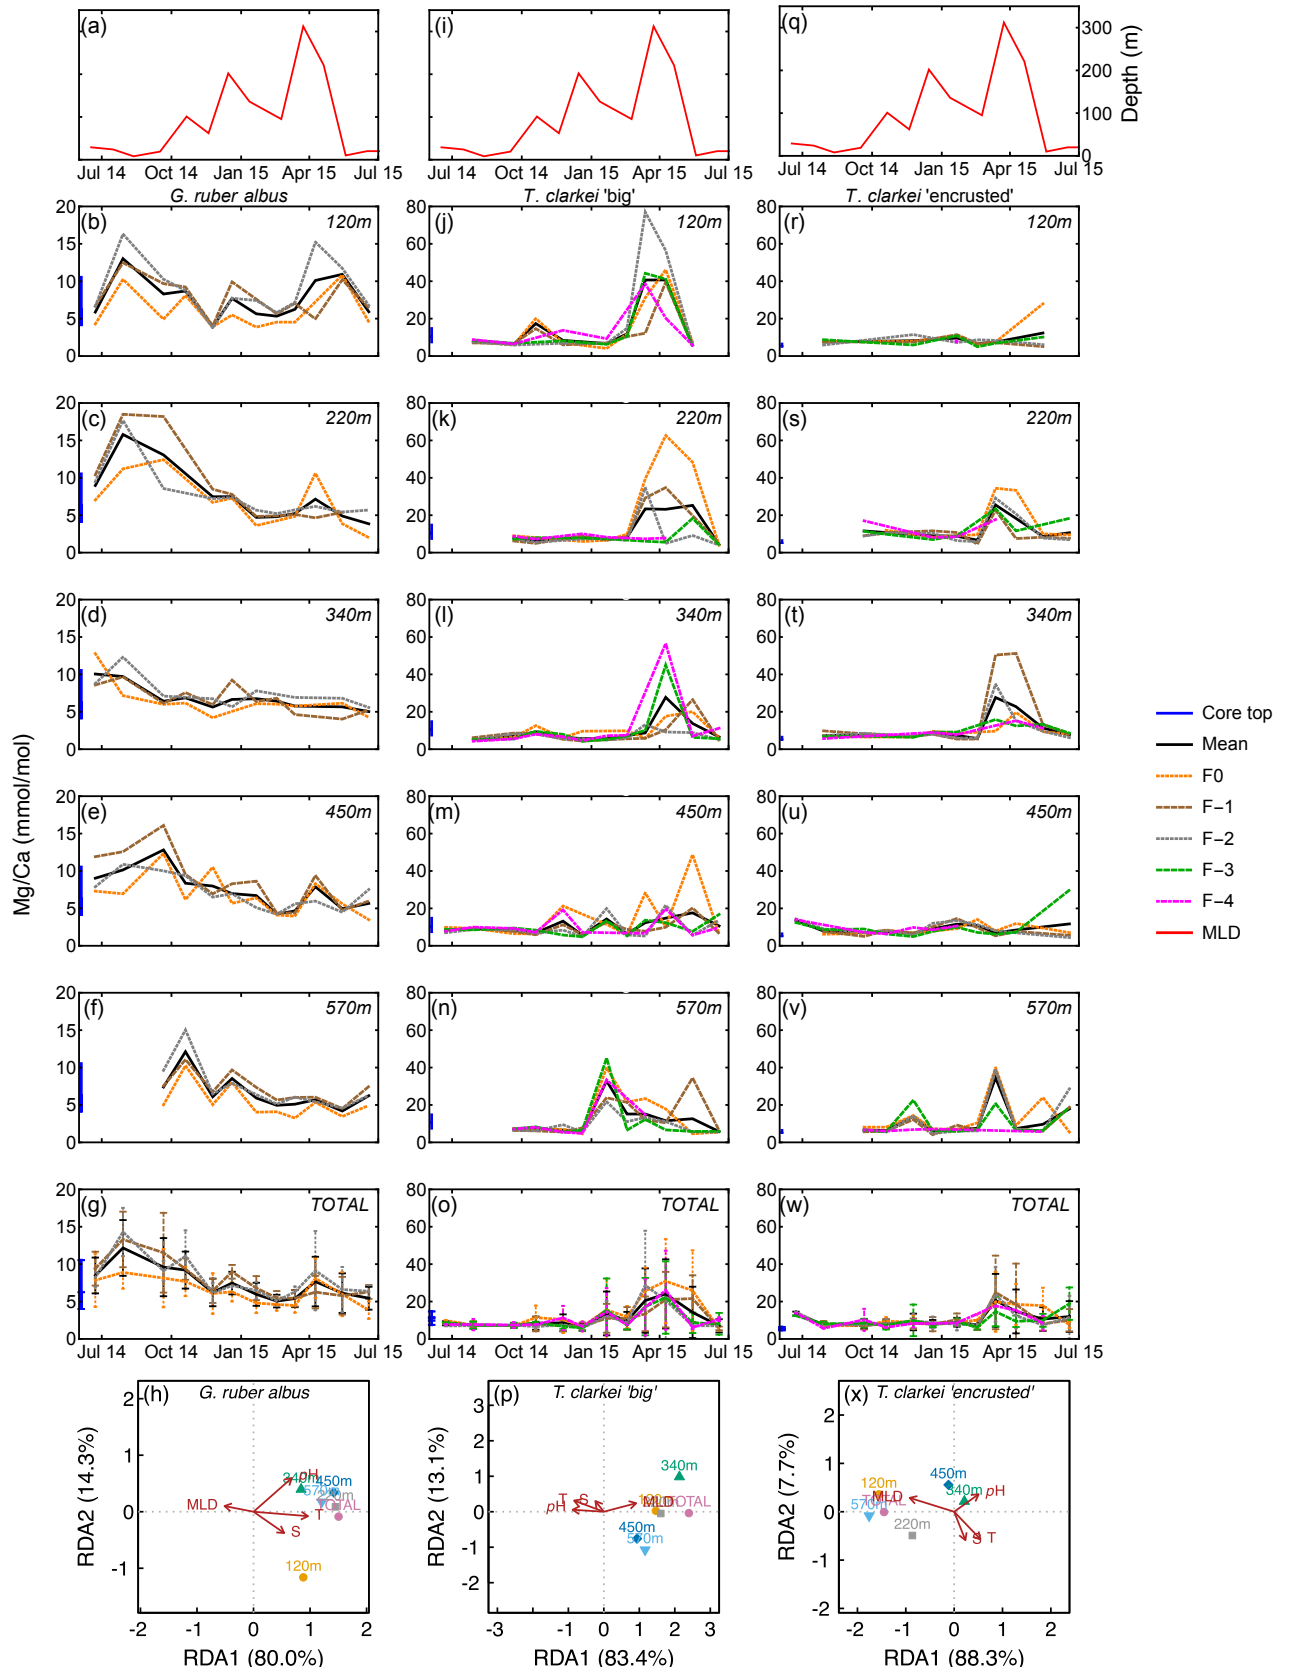

Figure 2: (top panels) MLD, Mg/Ca depth-timeseries (left column: *G. ruber*, middle: *T. clarkei* (big), right: *T. clarkei* (encrusted)), Mg/Ca chamber totals, (bottom panels) and RDA.

**Item 2:** This will also require a full report on some basic metrics:

- how many specimens and how many chambers were analyzed?
- What was the variability within ablation profiles? Etc.

*Reply 2:* In the revised paper we have reported the number of individuals (*G. ruber* = 57, *T. clarkei* (big) = 52, *T. clarkei* (encrusted) = 48) and chambers (measurements; *G. ruber* = 168, *T. clarkei* (big) = 242, *T. clarkei* (encrusted) = 204) that were analyzed (revised methodology chapter under section 2.2). We include details of the variability within the ablation profiles (section 2.3 in the revised manuscript): The average element-to-calcium ratio from the spot derived LA-ICP-MS count data was calculated from count data immediately after the start of the ablation peak apex until the point identified as the termination of calcite based on the Mg/Ca profile. This time interval represents the stable internal material of the shell; excluding the noisy beginnings and ends of the ablation event. For *G. ruber* the mean ablation time length used for calculation was  $4.9 \pm 2.3$  secs, while for the smaller thinner *T. clarkei* it was  $2.6 \pm 1.5$  secs and  $2.4 \pm 1.4$  secs, for ‘big’ and ‘encrusted’ types, respectively.”

**Item 3:** Much of the current Results is spent on differences in time for each of the water depth. But the patterns are very similar, so instead of repeating the results for the different water depths, I suggest to systematically answer the type of/ some of the questions I listed above and illustrate those with new figures.

*Reply 3:* The time-series figures have been revised to include additional panels showing the averaged values of all depths for each chamber and total mean values with SD (see Figure 2 here for example and our reply to Item 1; now Figures 3-7 in the revised manuscript).

**Item 4:** Including the MLD in figures 4-8 is confusing, at least in this way. It is the same for every panel. Maybe it works to include it as a color for when a sediment trap is above, and another color for when it is below the MLD. Hope I am making myself clear: the two colors would alternate within a panel and also be different for the different depths (but obviously remain the same for the three taxa. It may even be sufficient to include that information just for *G. ruber*.

*Reply 4:* You raise a very good point here and in the revised figures 3-7 we address how the MLD is shown by including separate panels on top of each PF species column for better visibility. However instead of superimposing when and how the sediment traps are within or below the MLD, we carried out statistical analyses of the MLD with relation to the El/Ca changes and SD of the El/Ca, as shown by the Spearman correlation matrices. We also take your suggestion for Redundancy Analysis (RDA) and included a statistical test with the MLD (see also our reply to Item #5 below). It is important to note that in the revised version of the manuscript the MLD has been recalculated to a higher depth resolution, using a different method which shows slightly different trends in comparison to the previous original manuscript (included description of method in the revised manuscript methods section).

**Item 5:** There is a surprising lack of statistical analysis, while the data allows for comparison along all kinds of dimensions (species, chambers, depths, etc.), which I therefore strongly encourage.

- a- The Spearman correlation matrix (figure 9, where the elements should not be near the tick marks between the squares, btw) may not be very useful here: the preceding figures show that the behavior between element in the F-chamber,

for example, is very similar. I find it interesting that on that level, some of the elements behave very similar (e.g. Mg and Sr), which is lost in the larger comparison of the correlation matrix.

- b- To disentangle the effect of the different parameters (species, depth, core top or trap, time, MLD, etc.) on the El/Ca and similarity between elements, an RDA may be more appropriate. This would also require rearrangement of section 4.2.

*Reply 5:* Thanks for this comment. As for statistical comparison between chambers please see our response to item #1. We thank you for your very important suggestion to apply RDA which we used to investigate the relationship between pooled mean element/Ca over given depths per species and correlation with environmental variables. We included RDA per species for El/Ca means for each depth and total means (bottom panels in figures 3-7 in the revised manuscript; see figure 2 here for example). In addition to MLD we included additional environmental parameters such as temperature, salinity and pH in these analyses. Given that the RDA assumes linear responses of El/Ca to environmental variables, we choose to include the Spearman correlation matrix as well which has the additional advantage for investigating non-linear correlation between variables and can aid in synthesizing large amounts of data. It appears that the main findings from the RDA and spearman correlation matrices complement each other. For example, in *G. ruber albus* 'Mg/Ca there is good correlation with Temperature, salinity and pH (as also shown in the respective RDA biplot), while for most El/Ca in *T. clarkiei* 'big' the MLD depth is highly correlative (see figure 3 below; Figure 9 in the revised manuscript).

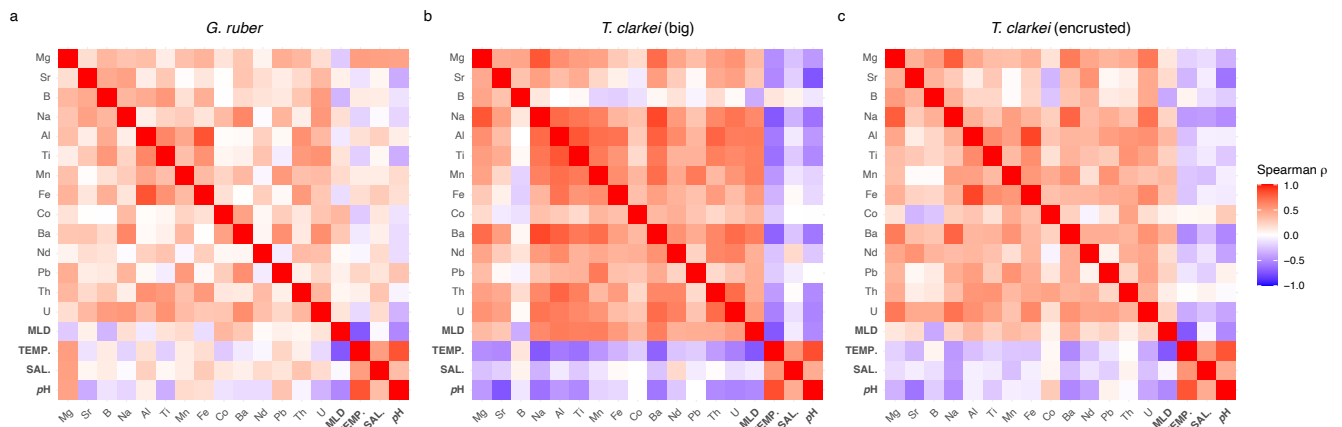

Figure 3: Spearman Correlation Matrix for mean El/Ca.

**Item 6:** The global compilation (section 5.3) is out of place. Here, all kinds of species are lumped, as well as types of analysis, seasons, etc. It takes a whole other approach to summarize this data and look for meaningful patterns. In the current version of this manuscript, it is also not clear what the overall goal of this comparison is and therefore it is not logically related to the Results and the rest of the Discussion.

*Reply 6:* Thanks for your suggestion. We consider this figure as an important addition to the manuscript, which provides a wide, global-scaled context to the new data reported here from

the GOA. We chose to compile this data despite the fact that different El/Ca were measured in regions, and not necessarily on the same species, or the same measuring method; while the data consistency in this compilation can clearly be improved in future, we believe it nevertheless provides important constraints on the interpretation of our new data, as well as previously published data. Therefore, we prefer to keep figure 12.

**Item 7: (in the pdf file)**

**Line 332: “This may be a good reason to illustrate this with some LA profiles and what the presence of such crust does to the length of the profiles/ heterogeneity within profiles? Is the crust equally thick across depths?”**

*Reply 7: Thank you for this point. Regarding the length of the ablation: the mean ablation time for T. clarkei ‘encrusted’ is 2.6 sec (with SD=1.5 sec) and for T. clarkei ‘big’ the mean ablation time is 2.4 sec (with SD=1.4 sec), meaning the difference is not great and falls within the error. While we agree that examining the heterogeneity of the ablation profiles of the crust will add much valuable information it is beyond the scope of this manuscript. As for whether the crust is equally thick across depths: we do not have measurements of whole shell thickness or just crust thickness in all the individuals we measured. During the laser ablation measurement, we observed that in T. clarkei ‘encrusted’ the dwelling time from the start of the ablation until a hole appeared may change between specimens from different depths; for example, in the individuals from September: the ablation dwelling time was between 2-4 seconds in 220 m and between 4-12 seconds in 570 m. Nevertheless, this observation has not been statistically tested nor does it necessarily reflect the thickness of the crust itself as it measures both layers (crust and internal layers) of the test. However, this question will be very interesting to investigate in a follow-up study.*

**Item 8: (in the pdf file)**

**Line 412: “it would be nice if the authors can say something about the possible causes for the deviation of El/Ca:**

- **Shorter ablation time affect the El/Ca average?**
- **Presence of coating skewing the relatively thin wall of F0?**
- **Biom mineralization processes?**
- **Maybe something else?**

*Reply 8: For both G. ruber albus and T. clarkei the final chamber is systematically different from the previous ones. But, while in G. ruber albus F0 is usually lower than the previous chambers in the same specimen, in T. clarkei it is usually higher.*

- *We do not think that the lower calculated temperatures from F0 in G. ruber are due to shorter ablation time as T. clarkei has a much shorter ablation time than G. ruber but still has higher F0 values.*
- *We also do not believe it’s the presence of a coating as G. ruber is not known for having a secondary crust at all. Furthermore, T. clarkei ‘encrusted’ which is coated with crust also has high F0 values compared to G. ruber which would have resulted in higher calculated temperatures (if it was suitable for reconstructing temperatures). If you are referring to coating of other materials (like glue for example or something which is found in the water), we don’t think it would cause the deviations of El/Ca as it should have had the same effect on both G. ruber albus and T. clarkei and not show two different systematics.*

- *The chamber differences could be related to the biomineralization processes, which would probably be species specific. Unfortunately, to check this is beyond the scope of this manuscript.*
- *Another possibility is the migration of *G. ruber albus* deeper in the water column while it calcifies its final chamber. However, we are not able to examine this option with the resolution of sediment traps that we have (every ~100 m).*

**Item 9: (in the pdf file)**

**Line 443-444: “but the variability in time in B/Ca does not match the variability in pH over time. This argues against such a control!”.**

*Reply 9: We see that the trends of the mean values of B/Ca in *T. clarkei* ‘big’ and ‘encrusted’ may match pH at certain depth intervals (350 m – 570 m; Figures 11h, 11i, 11j, 11n, 11o in revised manuscript). We clarified this in the revised manuscript (lines 743-751).*

**Item 10: (in the pdf)**

**Line 335-336: “But the variability among the different chambers for the two morphotypes are not always the same, right? For example, Mg/Ca at 450 meters. If the patterns in EI/Ca would be similar between the two *T. clarkei* morphotypes, they would not have to be shown separately.”**

*Reply 10: Indeed, the variability between the two phenotypes are not always the same, as also evident in the statistical differences, which is why they are shown separately.*

**Item 11: minor suggestions and corrections in the pdf file**

*Reply 11: All the minor suggestions and corrections raised will be addressed accordingly in the revised manuscript:*

Line 57: Deleted.

Line 58: Accepted.

Line 59-60: Accepted, clarified.

Line 62: Deleted.

Line 63: Noted and clarified. Lines 63-64 in the revised manuscript.

Line 70: Yes. We clarified this. Line 75 in the revised manuscript.

Line 71: Yes. We clarified this. Line 76-77 in the revised manuscript.

Line 74: Deleted.

Line 75: Deleted.

Line 76: Deleted.

Line 79: Deleted.

Line 113: Accepted, changed.

Line 119: Accepted, changed.

Line 131-133: Accepted and clarified (lines 145-150 in the revised manuscript)

Line 144: Accepted, clarified.

Lines 166: Accepted, changes.

Lines 167-168: Accepted, corrected.

Line 208-209: Accepted, clarified. Line 531 in the revised manuscript

Line 216: Accepted and moved to line 534 in the revised manuscript

Line 323-324: Accepted and clarified. Line 595 in the revised manuscript

Line 325: *Yes, changed accordingly (line 596-598 in the revised manuscript). See also our reply to Item #1.*

Sincerely,

Noy Levy on behalf of all co-authors
